# Supplementary material for: Comparative Metabolomics Reveals Changes in Secondary Metabolites during the Processing of Polygonatum cyrtonema Rhizome
Source: Preprints.org preprint supplement (doi:10.20944/preprints202401.0518.v1), 2024-01-08
Supplement: Supplementary file 1 [file supplementary]

## Sheet: SD3 vs. CP
	SD3 vs. CP
Index	Compounds	Class I	Class II	Formula	Level	CAS	SD3a	SD3b	SD3c	CPa	CPb	CPc
mws0160	3,4-Dihydroxybenzoic Acid Ethyl Ester (Protocatechuic acid ethyl ester)	Phenolic acids	Phenolic acids	C9H10O4	3	3943-89-3	17970.4	24706.5	14598	0	0	0
pma6298	3-Hydroxypyridine	Alkaloids	Pyridine alkaloids	C5H5NO	3	109-00-2	435246	673995	407173	0	0	0
Lmsn003111	1-O-p-Coumaroyl-β-D-glucose*	Phenolic acids	Phenolic acids	C15H18O8	2	7139-64-2	38305.4	91784.8	54773.6	0	0	0
pmp001073	Synephrine; 4-[1-Hydroxy-2-(methylamino)ethyl]phenol	Alkaloids	Phenolamine	C9H13NO2	3	94-07-5	2.38461e+06	2.37753e+06	4.02918e+06	0	0	0
ML10177402	4-Aminosalicylic acid	Phenolic acids	Phenolic acids	C7H7NO3	3	65-49-6	49261.4	54484	58199.9	0	0	0
MWSHC20168	Methyl cumalate	Phenolic acids	Phenolic acids	C7H6O4	1	6018-41-3	692952	784632	1.42923e+06	0	0	0
Wbmp006077	1,10-dimethoxy-6,6-dimethyl-2,9-di(propan-2-yloxy)-5,6,6a,7-tetrahydro-4H-dibenzo[de,g]quinolin-6-ium	Alkaloids	Alkaloids	C26H36NO4+	1	-	148611	225864	372952	0	0	0
mws0444	3-Aminosalicylic acid	Phenolic acids	Phenolic acids	C7H7NO3	3	570-23-0	179418	182014	204323	0	0	0
Hmdp000626	Polygonatine A	Alkaloids	Alkaloids	C9H11NO2	1	-	1.05072e+06	1.81378e+06	1.63403e+06	0	0	0
mws0885	2,4-Dihydroxybenzoic acid	Phenolic acids	Phenolic acids	C7H6O4	3	89-86-1	1.59887e+06	1.60657e+06	3.07019e+06	0	0	0
pmb2795	4-Methoxycinnamic acid	Phenolic acids	Phenolic acids	C10H10O3	3	830-09-1	74013.2	55653.9	76717.6	0	0	0
pmn001394	2,3,5,4'-Tetrahydroxystilbene-2-O-glucoside	Others	Stilbene	C20H22O9	2	82373-94-2	32072.6	48614.6	42603.8	0	0	0
Zblp007704	densiflorol B	Quinones	PhenAnthraquinones	C15H10O4	3	-	179066	149231	141737	0	0	0
Wcdp005613	1,2-dihydro-1-oxo-β-carboline	Alkaloids	Alkaloids	C11H8N2O	1	-	759264	461118	635102	0	0	0
Lmmn001552	Leonuriside A	Phenolic acids	Phenolic acids	C14H20O9	2	121748-12-7	174209	179950	493367	0	0	0
MWSmce339	2-Methoxycinnamic acid	Phenolic acids	Phenolic acids	C10H10O3	2	6099-03-2	85896.1	70495.9	62989.1	0	0	0
mws0183	3,4-Dihydroxybenzoic acid (Protocatechuic acid)*	Phenolic acids	Phenolic acids	C7H6O4	1	99-50-3	1.93774e+06	1.92069e+06	3.01054e+06	0	0	0
Wbkn004126	Javanicolide C	Terpenoids	Ditepenoids	C26H36O11	3	-	43810.3	46578.8	66151.8	0	0	0
Hmlp008487	Blumenol C	Terpenoids	Monoterpenoids	C13H22O2	2	36151-02-7	38624.9	21776.3	54504.7	0	0	0
mws0894	Glycitin	Flavonoids	Isoflavones	C22H22O10	3	40246-10-4	99118	52826.2	62144.2	0	0	0
Jmwn002057	2-(3-β-D-glucopyranosyloxy-4-hydroxyphenyl)ethanol-1-O-β-D-glucopyranoside	Phenolic acids	Phenolic acids	C20H30O13	3	-	347871	372729	515085	0	0	0
pme3200	1-Methylguanidine	Alkaloids	Alkaloids	C2H7N3	3	471-29-4	150708	123075	133066	0	0	0
Lmgn001670	Salicylic acid	Phenolic acids	Phenolic acids	C7H6O3	1	69-72-7	246671	263751	343557	0	0	0
Lmtp003569	(R)-Mandelamide	Alkaloids	Alkaloids	C8H9NO2	2	24008-62-6	116935	123489	138873	0	0	0
Wcdp004275	Lauramine oxide	Others	Others	C14H31NO	1	1643-20-5	27955.3	26943	39183.5	0	0	0
Wchn005575	1-(4'-Hydroxy-3'-methoxyphenyl)-2-[4''-(3-hydroxypropyl)-2'',6''-dimethoxyphenyl]-propane-1,3-Diol	Others	Others	C21H28O8	2	-	99083.5	92893.1	156865	0	0	0
pme0428	3,4,5-Trimethoxycinnamic acid	Phenolic acids	Phenolic acids	C12H14O5	3	90-50-6	14392.9	10604.1	21662.1	0	0	0
MWSHY0163	Aromadendrin (Dihydrokaempferol)	Flavonoids	Flavanonols	C15H12O6	2	480-20-6	15003.7	15743.3	18879.2	0	0	0
pmb3056	Homovanilloylquinic acid	Phenolic acids	Phenolic acids	C16H20O9	3	-	8390.02	7636.09	14654.7	0	0	0
Ladn005852	Graminone A	Lignans and Coumarins	Lignans	C20H20O7	3	161407-72-3	29301.9	21941.3	37674.5	0	0	0
Wbmp011422	5,8-Epidioxyergosta-6,22-dien-3-ol (Ergosterol peroxide)	Steroids	Steroid	C28H44O3	2	2061-64-5	18455.4	48398.7	25509.9	0	0	0
pmp001187	1-(Dihydroxyphenyl)-N2,N3-bis(4-hydroxyphenethyl)-(5-8)-dimethoxy-1,2dihydronaphthalene-2,3-dicarboxamide	Alkaloids	Phenolamine	C36H36N2O8	1	-	42501.5	22859.1	43715.9	0	0	0
MWS1839	Ethylparaben	Phenolic acids	Phenolic acids	C9H10O3	3	120-47-8	26022.5	27047.7	37460.5	0	0	0
Lmmn004685	Nectandrin B	Lignans and Coumarins	Lignans	C20H24O5	2	74683-16-2	16346.2	35830.8	22342	0	0	0
Wmlp000056	3,5-Dimethoxy-4-hydroxybenzaldehyde	Others	Aldehyde compounds	C9H10O4	3	-	97857.9	97405.6	81862.1	0	0	0
pmn001399	2,4,6,4'-Tetrahydroxy-stilbene-2-O-glucoside	Others	Stilbene	C20H22O9	2	-	21421.2	23957.2	25039.6	0	0	0
Zmyn002856	3-(Hydroxymethyl)phenol	Phenolic acids	Phenolic acids	C7H8O2	2	620-24-6	75657.3	91137	96737.7	0	0	0
pmp000608	Aurantio-obtusin-6-O-Glucoside	Quinones	Anthraquinone	C23H24O12	3	129025-96-3	231595	223989	743051	0	0	0
Xmsn004568	Mudanpioside F	Terpenoids	Monoterpenoids	C16H24O8	1	-	28565.3	37115.1	60344	0	0	0
MWSslk186	8-O-Acetylharpagide	Terpenoids	Monoterpenoids	C17H26O11	2	6926-14-3	11976.9	9801.59	8697.81	0	0	0
Wcdp000839	5-methylfurfural	Others	Others	C6H6O2	2	620-02-0	417391	319076	448895	0	0	0
pmb4777	4-Hydroxy-7-methoxycoumarin-β-rhamnoside	Lignans and Coumarins	Coumarins	C16H18O8	2	-	3744.59	10984.2	15453.8	0	0	0
Zmsp000758	1-(Hydroxymethyl)hexahydro-1h-pyrrolizin-2-ol	Alkaloids	Pyrrole alkaloids	C8H15NO2	2	-	1.68254e+07	1.87657e+07	1.48782e+07	0	0	0
Lmwp102713	(S)-Peucedanol	Lignans and Coumarins	Coumarins	C14H16O5	2	-	72640.4	59111.3	69540.2	0	0	0
Wchn003594	4-hydroxy-4-(2-hydroxyphenyl)butanoic acid	Others	Others	C10H12O4	2	-	20403	22332.9	38751.7	0	0	0
NK10253223	2-Amino-3-methoxybenzoic acid	Phenolic acids	Phenolic acids	C8H9NO3	3	3177-80-8	309056	269949	300393	0	0	0
mws0025	Pyrogallol	Phenolic acids	Phenolic acids	C6H6O3	3	87-66-1	239999	286114	258437	0	0	0
Lmsn002288	1-O-Caffeoyl-(6-O-glucosyl)-β-D-glucose	Phenolic acids	Phenolic acids	C21H28O14	2	-	203075	227383	145954	0	0	0
MWS5206	4-Hydroxyphenyllactic Acid	Phenolic acids	Phenolic acids	C9H10O4	3	306-23-0	32895.1	30577.6	40229.5	0	0	0
Zmjn003003	3,4-Dimethoxybenzoic acid; Veratric acid	Phenolic acids	Phenolic acids	C9H10O4	3	93-07-2	22837.1	36091.5	46308.9	0	0	0
Hmdp003403	Spirost-5-ene-3,27-diol-27-O-glucoside-3-O-[rhamnosyl(1→4)]glucoside (Polygonatoside D)*	Steroids	Steroidal saponins	C45H72O18	2	-	203750	506201	426922	0	0	0
Yamn004462	6-((4-(3-hydroxy-2-(4-(3-hydroxypropyl)-2-methylphenoxy)propoxy)-2-methoxyphenoxy)methyl)tetrahydro-2H-pyran-2,3,4,5-tetraol	Lignans and Coumarins	Lignans	C26H36O11	1	-	31544	40625.7	56691.3	0	0	0
Lmmp002013	Dihydroferuloylputrescine	Alkaloids	Phenolamine	C14H22N2O3	2	-	155345	122164	220663	0	0	0
MWSslk183	7,8-Dihydroxy-4-phenylcoumarin	Lignans and Coumarins	Coumarins	C15H10O4	2	842-01-3	672406	495801	523238	0	0	0
Zmpp000906	Norepinephrine	Alkaloids	Alkaloids	C8H11NO3	1	51-41-2	27159.1	15618	23325.1	0	0	0
HJAP050	N-Feruloyl-3-methoxytyramine*	Alkaloids	Phenolamine	C19H21NO5	3	78510-19-7	34710.2	30595.2	48157.3	0	0	0
ZbWp001556	5-guanidino-2-(2-hydroxyethyl)pentanoic acid	Others	Others	C8H17N3O3	2	-	123496	161669	129108	0	0	0
Wayp004564	4-hydroxy-4-(3-pyridyl)-butanoic acid	Alkaloids	Pyridine alkaloids	C9H11NO3	2	15569-97-8	422524	660370	374177	0	0	0
Zbsn003878	Vicenin-3	Flavonoids	Flavones	C26H28O14	2	59914-91-9	335712	378365	730116	0	0	0
Hmsn002272	Demethyl coniferin	Phenolic acids	Phenolic acids	C15H20O8	3	-	757738	860980	1.00195e+06	0	0	0
Lmyn002788	Methyl gallate	Phenolic acids	Phenolic acids	C8H8O5	3	99-24-1	73768.7	67175.3	107272	0	0	0
Wayn000370	N-(1-Deoxy-1-fructosyl)Piperidic acid	Alkaloids	Alkaloids	C10H19NO7	3	-	40250.5	44005.6	45761.6	0	0	0
HJN055	Dihydrocharcone-4'-O-glucoside	Flavonoids	Chalcones	C21H24O10	3	-	16475.9	18902.9	37844.7	0	0	0
MWS20177	5-hydroxy-anthraquinone-2-carboxylic acid	Quinones	Anthraquinone	C15H8O5	2	-	34210.7	37113.5	38001.3	0	0	0
Ladp002110	4-hydroxy-2-oxo-1,2-dihydroquinoline-3-carboxylic acid	Alkaloids	Quinoline alkaloids	C10H7NO4	2	73776-24-6	639482	486158	621894	0	0	0
Lmjp005170	4,9-Dihydroxy-α-Lapachone	Quinones	Quinones	C15H14O5	2	56473-67-7	24862.7	17100.1	63875.2	0	0	0
MA10107783	3-[(1-Carboxyvinyl)oxy]benzoic acid	Phenolic acids	Phenolic acids	C10H8O5	3	16929-37-6	70270.4	48844.8	88868.5	0	0	0
Lmmp003517	Solatuberenol A	Others	Others	C13H20O3	3	-	53972.3	35825.9	94523	0	0	0
MWSHC2029	Harman-3-carboxylic acid	Alkaloids	Plumerane	C13H10N2O2	2	22329-38-0	107886	72506	105312	0	0	0
MWSmce518	5,7-Dihydroxy-4-Phenylcoumarin	Lignans and Coumarins	Coumarins	C15H10O4	2	7758-73-8	5190	5036.5	12205.3	0	0	0
MWSmce460	2-Piperidone	Alkaloids	Piperidine alkaloids	C5H9NO	2	675-20-7	371978	291982	466550	0	0	0
MWSmce455	Vanillic acid methyl ester	Phenolic acids	Phenolic acids	C9H10O4	3	3943-74-6	25956.3	19574.4	14331.7	0	0	0
mws0982	1-Methylhistamine	Alkaloids	Alkaloids	C6H11N3	2	501-75-7	427246	353429	588755	0	0	0
HJAP051	3-(3,4,5-Trimethoxyphenyl)propan-1-ol	Phenolic acids	Phenolic acids	C12H18O4	2	-	63912.8	62978.7	65505.9	0	0	0
MWSmce208	Norharmane; Beta-Carboline	Alkaloids	Plumerane	C11H8N2	2	244-63-3	4.97684e+06	2.78984e+06	5.25861e+06	0	0	0
Hmln000873	2-O-Galloyl-D-glucose	Phenolic acids	Phenolic acids	C13H16O10	3	-	4238.92	15097.4	18846.8	0	0	0
pme1137	6-Hydroxynicotinic acid	Alkaloids	Pyridine alkaloids	C6H5NO3	2	5006-66-6	4.61183e+06	4.99435e+06	4.76096e+06	0	0	0
Zbdn007423	6,7-Dimethoxy-4-chromanone	Flavonoids	Other Flavonoids	C11H12O4	3	-	1670.67	3648.66	8459.8	0	0	0
MWS2069	2-Methoxy-4-methylphenol	Phenolic acids	Phenolic acids	C8H10O2	3	93-51-6	55241.6	38967.1	29236	0	0	0
Xmqp004074	Peucedanol 3'-O-glucoside	Lignans and Coumarins	Coumarins	C20H26O10	2	65891-61-4	235583	166795	293069	0	0	0
Lmmp001410	Dihydrocaffeoylputrescine	Alkaloids	Phenolamine	C13H20N2O3	2	-	1.37015e+06	1.56523e+06	1.19621e+06	0	0	0
Wbjp002870	1,3-Dimethyl-2-oxo-5-methoxyindoline-3-acetamide	Alkaloids	Alkaloids	C13H16N2O3	2	-	44148.8	69874.8	44357.6	0	0	0
pmp001004	Perlolyrine	Alkaloids	Plumerane	C16H12N2O2	1	29700-20-7	5.90136e+06	3.39112e+06	6.42158e+06	0	0	0
pmp001265	2-Amino-4-dihydroxy octadecyl galactoside	Alkaloids	Alkaloids	C24H49NO8	2	-	83897.5	101084	109904	0	0	0
Hmdp003423	Spirost-5-en-3-ol-3-O-glucosyl(1→2)glucosyl(l→4)galactoside (Neosibiricoside D)*	Steroids	Steroidal saponins	C45H72O18	2	880152-67-0	229376	495338	452584	0	0	0
Lmyn011818	3,19-Epoxy-3,22-dihydroxydammara-20,24-dien-26-oic acid δ-lactone (Semialactone)	Terpenoids	Triterpene	C30H44O4	3	366450-46-6	29768.1	24399.2	31952.8	0	0	0
Zmxp005324	Dihydrodehydrodiconiferyl alcohol	Lignans and Coumarins	Lignans	C20H24O6	3	126253-41-6	21048.8	22776.4	25236.5	0	0	0
Lmhp002153	N-p-Coumaroylhydroxyputrescine	Alkaloids	Phenolamine	C13H18N2O3	2	-	93384.2	142666	76977.8	0	0	0
zjgp122326	Pyridine-4-formyl-O-β-D-glucopyranoside	Others	Others	C12H15NO7	2	-	176927	228934	280561	0	0	0
Wcfp006751	Plumbagin; 5-Hydroxy-2-Methyl-1,4-Naphthoquinone	Quinones	Quinones	C11H8O3	2	481-42-5	21704	22332.4	51216.3	0	0	0
MWSmce355	Methyl Syringate	Phenolic acids	Phenolic acids	C10H12O5	3	884-35-5	24247.2	15512.5	18727.2	0	0	0
Lhmp110110	Pyramidatin F(iso-01)	Others	Others	C22H24O7	2	-	26749.4	28702.4	22696.9	0	0	0
Wbjp006749	N-(4-Hydroxyphenethyl)-2-(3-methoxy-4-hydroxyphenyl)-5-[(Z)-2-[2-methoxy-4-[(E)-2-[(4-hydroxyphenethyl)carbamoyl]ethenyl]phenoxy]-2-[(4-hydroxyphenethyl)carbamoyl]ethenyl]-7-methoxy-2,3-dihydrobenzofuran-3-carboxamide	Alkaloids	Alkaloids	C54H53N3O12	2	-	13086.7	10192.8	7716.97	0	0	0
mws0098	Indole-2-carboxylic acid	Alkaloids	Plumerane	C9H7NO2	3	1477-50-5	70087.4	68397.8	67105.9	0	0	0
Wbkp005691	3-(4-methoxy-9H-pyrido[3,4-b]indol-1-yl)propanoic acid	Alkaloids	Alkaloids	C15H14N2O3	1	-	617721	637458	749224	0	0	0
Ymsp002308	4'-O-Methylnorbelladine	Alkaloids	Alkaloids	C16H19NO3	2	4579-60-6	76025.8	38120.1	118923	0	0	0
MWS1854	4-Aminophenol	Alkaloids	Phenolamine	C6H7NO	2	123-30-8	56155.6	46208.4	86644	0	0	0
MWStz201	β-Carboline-1-propanoic acid	Alkaloids	Plumerane	C14H12N2O2	3	89915-39-9	489750	381135	324273	0	0	0
Cmlp002704	Folicanthine	Alkaloids	Plumerane	C24H30N4	3	6879-55-6	211687	257352	194760	0	0	0
pmb0752	3-O-Feruloylquinic acid*	Phenolic acids	Phenolic acids	C17H20O9	3	1899-29-2	1.36144e+06	1.2566e+06	2.33028e+06	0	0	0
mws0005	Tryptamine	Alkaloids	Plumerane	C10H12N2	3	61-54-1	315841	316253	341590	0	0	0
pmp001311	6-Hydroxykaempferol-7,6-O-Diglucoside	Flavonoids	Flavonols	C27H30O17	3	-	100434	152980	71642.2	0	0	0
MWSmce713	3-(4-Hydroxyphenyl)-1-propanol	Phenolic acids	Phenolic acids	C9H12O2	3	10210-17-0	18908.6	11815.7	21902.2	0	0	0
Sadp008019	5-formyl-2,7-dihydroxy-1,6-dimethyl-9,10-dihydrophenanthrene	Terpenoids	Ditepenoids	C17H16O3	2	-	84522	61783.6	100537	0	0	0
Qatp004621	Machilin H(ISO1)	Lignans and Coumarins	Lignans	C21H26O6	2	-	172109	222667	323788	0	0	0
Zmpn003044	7-Hydroxycoumarin;Umbelliferone	Lignans and Coumarins	Coumarins	C9H6O3	3	93-35-6	7825.76	7291.81	8088	0	0	0
Wadn003423	Salvianic acid C	Phenolic acids	Phenolic acids	C18H18O9	2	-	92468.4	95372.9	155540	0	0	0
Cmcp002990	Lochrovidine	Alkaloids	Alkaloids	C22H26N2O4	2	1359-09-7	758660	772294	1.59019e+06	0	0	0
Hmtn001288	Methyl 2,4-dihydroxyphenylacetate	Phenolic acids	Phenolic acids	C9H10O4	3	67828-42-6	38045	24509.8	45870.3	0	0	0
Wmgp004939	N-Desmethoxyrankinidine	Alkaloids	Plumerane	C19H22O2N2	3	-	161157	142685	161607	0	0	0
MW0133705	4'-Methoxyflavone	Flavonoids	Flavones	C16H12O3	3	4143-74-2	5471.34	3975.7	6967.36	0	0	0
Smbp002161	8-ethylnorlobelol	Alkaloids	Piperidine alkaloids	C9H19NO	2	-	67301.5	46359.2	66795	0	0	0
Latp004059	4-(Trans)-acetul-3,6,8-trihydroxy-3-methyl-dihydronapht halenone	Others	Chromone	C13H14O5	2	-	148955	178850	283386	0	0	0
Lahp005848	pithecellobiumol B	Others	Chromone	C10H10O4	3	-	1.64151e+06	2.26134e+06	2.09363e+06	0	0	0
Ymjm000116	6-O-Acetylarbutin	Phenolic acids	Phenolic acids	C14H18O8	2	10338-88-2	112833	173151	268336	0	0	0
HJAP048	2,4,5-Trimethoxybenzoic acid	Phenolic acids	Phenolic acids	C10H12O5	2	-	1.15422e+06	869371	938261	0	0	0
mws1014	Fraxetin (7,8-Dihydroxy-6-methoxycoumarin)	Lignans and Coumarins	Coumarins	C10H8O5	3	574-84-5	187600	442776	138455	0	0	0
Wbhp008068	(1R,4aS,4bR,7R,8R,8aR,9S,10aR)-7-ethenyl-8,8a,9-trihydroxy-1,4a,7-trimethyl-2,3,4,4b,5,6,8,9,10,10a-decahydrophenanthrene-1-carboxylic acid	Terpenoids	Terpene	C20H32O5	3	-	152950	201870	335777	0	0	0
Hmcp001579	Limocitrin-3-O-sophoroside*	Flavonoids	Flavonols	C29H34O18	3	-	283755	203447	338757	0	0	0
Lskp211278	Oxypinnatanine A	Alkaloids	Alkaloids	C10H16N2O5	2	-	141683	62301.8	138244	0	0	0
pmb2601	7-Hydroxycoumarin-O-rhamnoside	Lignans and Coumarins	Coumarins	C15H16O7	3	-	44378	51197.4	87437.5	0	0	0
Lmcp002933	Pilosine	Alkaloids	Alkaloids	C16H18N2O3	1	13640-28-3	530520	404732	453592	0	0	0
Wbtp005739	Dioxyxanthon	Flavonoids	Other Flavonoids	C13H8O4	2	-	38612.6	68216.3	52872.1	0	0	0
pmn001505	Oleanolic acid-3-O-xylosyl(1→3)glucuronide	Terpenoids	Triterpene Saponin	C41H64O13	3	-	11909	7798.64	20526	0	0	0
Cmxn004016	Dihydromarein	Flavonoids	Chalcones	C21H24O11	3	-	8316.96	7683.98	19569.4	0	0	0
mws1574	Geniposidic acid*	Terpenoids	Monoterpenoids	C16H22O10	3	27741-01-1	39649.7	28703.1	61219.2	0	0	0
Lmtp002942	Apigenin-6,8-di-C-arabinoside*	Flavonoids	Flavones	C25H26O13	1	-	1.4477e+06	947156	1.69038e+06	0	0	0
Zmhn002227	4-O-Glucosyl-sinapate	Phenolic acids	Phenolic acids	C17H22O10	1	-	48632.8	50596.2	40940.1	0	0	0
Lmwp003442	Amoenin	Flavonoids	Flavonols	C21H20O11	3	-	89945.6	122548	126274	0	0	0
Lahp004442	3,4-Dihydro-4-(4'-hydroxyphenyl)-5,7-dihydroxycoumarin	Lignans and Coumarins	Coumarins	C15H12O5	3	-	3537.75	7334.59	9164.85	0	0	0
Lmtp002474	Apigenin-6-C-(2''-glucosyl)arabinoside	Flavonoids	Flavones	C26H28O14	1	-	429084	498109	685451	0	0	0
MWSHC20105	4-ketopinoresinol	Lignans and Coumarins	Lignans	C20H20O7	1	66288-89-9	23218.6	31334.7	32360.3	0	0	0
Yamp002097	1-[2-(Furan-2-yl)-2-oxoethyl]pyrrolidin-2-One	Alkaloids	Alkaloids	C10H11NO3	3	-	408263	512041	506303	0	0	0
mws5028	2-Benzoxazolinone	Alkaloids	Alkaloids	C7H5NO2	2	59-49-4	83811.9	187278	80469.7	0	0	0
pmp001189	(5-8)-Hydroxy-1-(hydroxyldimethoxyphenyl)-N2,N3-bis(4-hydroxyphenethyl)-(5-8)-dimethoxy-1,2-dihydronaphthalene-2,3-dicarboxamide	Alkaloids	Phenolamine	C38H40N2O10	2	-	7635.95	5891.5	8540.67	0	0	0
MWSmce632	Vanillin acetate	Phenolic acids	Phenolic acids	C10H10O4	3	881-68-5	8603.12	5517.51	13095.9	0	0	0
MWS3020	N-Acetylcadaverine	Alkaloids	Alkaloids	C7H16N2O	3	32343-73-0	200323	206237	253926	0	0	0
Lmdn001501	Gardoside*	Terpenoids	Monoterpenoids	C16H22O10	3	54835-76-6	26939.1	29405.9	53629.9	0	0	0
Wbjp003603	3-Hydroxy-3-[(6-methyl-2-pyridyl)methyl]-5-methoxyindoline-2-one	Alkaloids	Alkaloids	C16H16N2O3	2	-	446578	383337	503112	0	0	0
Lmtp002822	Apigenin-6-C-arabinoside-8-C-xyloside*	Flavonoids	Flavones	C25H26O13	1	-	1.17952e+06	985333	2.03052e+06	0	0	0
Hmdp001950	2',7-Dihydroxy-3',4'-dimethoxyisoflavan	Flavonoids	Other Flavonoids	C17H18O5	2	52250-35-8	1.98169e+07	1.09169e+07	1.85139e+07	0	0	0
pmb3074	5-O-p-Coumaroylquinic acid	Phenolic acids	Phenolic acids	C16H18O8	3	1899-30-5	60927.7	97240.3	172431	0	0	0
mws1429	Vomifoliol (Blumenol A)	Terpenoids	Monoterpenoids	C13H20O3	2	189351-15-3	9842.8	6887.85	8861.79	0	0	0
MWSslk011	2-Methoxy-1,4-naphthoquinone (Lawsone methyl ether)	Quinones	Quinones	C11H8O3	2	2348-82-5	22008.3	16266.5	37780	0	0	0
Wchn003984	1,4,8-Trihydroxynaphthalene-1-O-glucoside	Quinones	Naphthol	C16H18O8	3	39015-63-9	38441.8	35118.2	154150	0	0	0
Zjcp102033	nuatigenin-Glc-Glc-Glc	Steroids	Steroidal saponins	C45H72O19	3	-	74802.6	139035	22068.6	0	0	0
Lhfp110832	Furanoeremophilane	Terpenoids	Sesquiterpenoids	C15H22O	3	6750-13-6	53565	47941.4	72602.2	0	0	0
Lmzp004885	Tricin (5,7,4'-Trihydroxy-3',5'-dimethoxyflavone)	Flavonoids	Flavones	C17H14O7	2	520-32-1	37484.2	17201.5	41282.3	0	0	0
Lxmp122302	Dehydroxyampelopsisionoside	Terpenoids	Sesquiterpenoids	C19H32O7	3	-	74108.5	65574.1	60368.6	0	0	0
Zmhp102730	6-Hydroxykaempferol-3,6-O-Diglucoside*	Flavonoids	Flavonols	C27H30O17	3	-	105294	149046	68545.8	0	0	0
Hmcp001628	Limocitrin-3,7-di-O-glucoside*	Flavonoids	Flavonols	C29H34O18	3	-	299444	202215	336583	0	0	0
MWS3149	3-Methoxybenzoic acid	Phenolic acids	Phenolic acids	C8H8O3	3	586-38-9	5469.39	5081.27	3203.44	0	0	0
MWS20194	Cinnamic acid	Phenolic acids	Phenolic acids	C9H8O2	3	140-10-3	785715	342871	1.0571e+06	0	0	0
Layp003558	3,4,5-Trimethoxyphenol-1-O-β-D-glucoside	Phenolic acids	Phenolic acids	C15H22O9	2	-	174580	259054	325101	0	0	0
Lazn004665	Triacanthinapioside	Alkaloids	Alkaloids	C15H21N5O4	1	-	82657.4	46308.1	57587.5	0	0	0
Lamp006064	3-[(3,4-dihydroxyphenyl)methylidene]-5,7-dihydroxy-6-methoxy-2h-1-benzopyran-4-one glucosyl rhamnoside	Flavonoids	Other Flavonoids	C29H34O16	1	-	1.52127e+06	1.32887e+06	3.37174e+06	0	0	0
Lmcp005645	Quercetin-3,4'-Dimethyl Ether	Flavonoids	Flavonols	C17H14O7	2	33429-83-3	63739.2	53317.5	45566.2	0	0	0
Lajp005753	5,3'-dihydroxy-6,7,4'-trimethoxyflavone-8-O-β-D-glucoside	Flavonoids	Flavones	C23H24O12	3	-	123908	238223	475133	0	0	0
Smnp002454	Aloin B	Quinones	Anthraquinone	C21H22O9	3	28371-16-6	19201.6	14245.3	35214.4	0	0	0
MWSHY0057	Baicalin	Flavonoids	Flavones	C21H18O11	2	21967-41-9	30806.7	35236.4	23486	0	0	0
Hmjp006104	N-Cis-Feruloyl-3'-O-methyldopamine*	Alkaloids	Phenolamine	C19H21NO5	3	-	30156	19437.8	52197.7	0	0	0
Lmtp002642	Apigenin-8-C-(2''-glucosyl)arabinoside	Flavonoids	Flavones	C26H28O14	1	-	470303	462876	770180	0	0	0
Lmsn002548	1-O-Caffeoyl-β-D-glucose	Phenolic acids	Phenolic acids	C15H18O9	3	14364-08-0	29927.2	13493.1	45771.1	0	0	0
Zjbp081718	27-Hydroxyspirost-5-en-3-yl-O-rhamnosyl-(1→2)-O-[glucosyl-(1→6)]-glucoside	Steroids	Steroidal saponins	C45H72O18	1	-	269300	408878	350275	0	0	0
Lmmp002796	Gossypetin-3-O-rutinoside	Flavonoids	Flavonols	C27H30O17	3	-	0	0	0	1.73383e+06	218097	240428
pma0702	N1,N8-Bis(sinapoyl)spermidine	Alkaloids	Phenolamine	C29H39N3O8	3	-	0	0	0	53277	11720.1	56769.7
HX1356	(7R,8S)-9-acetyl-dehydrodiconiferyl alcohol	Lignans and Coumarins	Lignans	C22H24O7	3	-	0	0	0	31503.5	19715.5	22556.5

## Sheet: SD6 vs. SD3 
SD6 vs. SD3
Index	Compounds	Class I	Class II	Formula	Level	CAS	SD6a	SD6b	SD6c	SD3a	SD3b	SD3c
Lacp001298	4-Hydroxy-3-methoxy-β-phenethylamine	Alkaloids	Phenolamine	C9H13NO2	2	-	199802	164913	170064	0	0	0
mws0014	Ferulic acid*	Phenolic acids	Phenolic acids	C10H10O4	2	537-98-4	90761.2	88069.5	73812.2	0	0	0
MWStz104	3,4-Dimethoxybenzamide	Alkaloids	Phenolamine	C9H11NO3	3	1521-41-1	488006	390362	303605	0	0	0
mws0346	3-(3-Hydroxyphenyl)-propionic acid	Phenolic acids	Phenolic acids	C9H10O3	3	621-54-5	29381.4	19743.7	27475.1	0	0	0
Lajp007517	7-Methoxy-8-(2'-methoxy-3'-hydroxy-3'-methylbutyl)coumarin	Lignans and Coumarins	Coumarins	C16H20O5	2	-	30796.6	34593.6	15256.4	0	0	0
Lmsn003297	3,4,2',4',6'-Pentahydroxychalcone-4'-O-glucoside	Flavonoids	Chalcones	C21H22O11	3	-	240673	236765	189369	0	0	0
Zmdn004719	2-(2'-hydroxypropyl)-5-methyl-7-hydroxychromone	Others	Chromone	C13H14O4	2	-	209114	198749	146530	0	0	0
Salp002057	neoverataline A	Alkaloids	Steroid alkaloids	C27H41NO8	3	-	1.77083e+07	2.0719e+07	1.37635e+07	0	0	0
pmn001581	Sexangularetin	Flavonoids	Flavonols	C16H12O7	3	571-74-4	48056.6	48079.4	47502.9	0	0	0
Wdtp003242	methyl-4,5-diacetyloxy-6-[4-(hydroxymethyl)phenoxy]-3-methyloxane-2-carboxylate	Phenolic acids	Phenolic acids	C19H24O9	2	-	157411	147209	125901	0	0	0
Lasp006911	1,3,8-Trihydroxy-10-methylacridin-9(10H)-one	Alkaloids	Quinorisidine alkaloids	C14H11NO4	3	-	99290.5	61652.4	72031	0	0	0
Hmdp001676	N-p-Coumaroyloctopamine	Alkaloids	Phenolamine	C17H17NO4	3	66648-45-1	306084	333262	302875	0	0	0
pma0702	N1,N8-Bis(sinapoyl)spermidine	Alkaloids	Phenolamine	C29H39N3O8	3	-	7780.76	5727.39	10083.6	0	0	0
Wasn003547	Heptane-1,7-diol sulfate	Others	Others	C7H16O5S	3	-	70714.9	74109	57234.6	0	0	0
MWSHY0017	Naringenin (5,7,4'-Trihydroxyflavanone)*	Flavonoids	Flavanones	C15H12O5	3	480-41-1	51233.7	58339.4	50663	0	0	0
mws0044	Taxifolin(Dihydroquercetin)	Flavonoids	Flavanonols	C15H12O7	3	480-18-2	16274.7	14515.9	10093.5	0	0	0
Wbjp001169	o-Carboxy-5-hydroxytryptamine	Alkaloids	Alkaloids	C11H12N2O3	2	-	0	0	0	160065	83783.4	96683.9
Zbfn002690	1-(4-Hydroxybenzoyl)Glucose; 25545-07-7	Phenolic acids	Phenolic acids	C13H16O8	3	-	0	0	0	16684.5	14512.4	13440.5
Zmbp002538	1-Methoxy-indole-3-acetamide	Alkaloids	Plumerane	C11H12N2O2	1	-	0	0	0	502328	422442	236937
MWSmce621	Chicoric Acid	Phenolic acids	Phenolic acids	C22H18O12	3	70831-56-0	0	0	0	4709.27	16500.2	11229.5
Lmhp003217	2'-Hydoxy-5-methoxyGenistein-O-rhamnosyl-glucoside	Flavonoids	Isoflavones	C28H32O16	3	-	0	0	0	79387.3	89100.6	101467
Lahp002608	3,5-Dihydro-2H-Furo[3,2-C]Quinolin-4-One	Alkaloids	Quinoline alkaloids	C11H9NO2	1	-	0	0	0	1.32025e+06	1.13662e+06	658147
Wagp002530	2-Methoxy-1-benzofuran-5-carbaldehyde	Others	Others	C10H8O3	3	-	0	0	0	342711	417082	276697
pmb0502	p-Coumaroylspermidine	Alkaloids	Phenolamine	C16H25N3O2	2	-	0	0	0	831833	841952	565225
Lahp001956	Pyran[3,4-b]indole-2-ketone	Alkaloids	Plumerane	C11H9O2N	3	-	0	0	0	1.50403e+06	1.14118e+06	621903
Hmmp001310	3-Indoleacrylic acid	Alkaloids	Plumerane	C11H9NO2	1	1204-06-4	0	0	0	7.97195e+06	5.95741e+06	3.12201e+06
pmb0818	Methoxyindoleacetic acid	Alkaloids	Plumerane	C11H11NO3	3	3471-31-6	0	0	0	1.12678e+06	883645	466536
Saln003574	Genameside C	Terpenoids	Monoterpenoids	C23H34O15	3	-	0	0	0	43415.4	51408.9	41569.8
mws0059	Quercetin-3-O-rutinoside (Rutin)	Flavonoids	Flavonols	C27H30O16	3	153-18-4	0	0	0	12726.4	11742.6	6377.51
Lmsn000363	Raspberryketone glucoside	Phenolic acids	Phenolic acids	C16H22O7	3	38963-94-9	0	0	0	37255.5	35021.5	40954.1
Hmjp002999	Isorhamnetin-3-O-rutinoside (Narcissin)*	Flavonoids	Flavonols	C28H32O16	3	604-80-8	0	0	0	74045	16694.6	96231.9
Wcjp002598	8-hydroxyquinoline	Alkaloids	Quinoline alkaloids	C9H7NO	2	148-24-3	0	0	0	457145	444411	205730
Lmsp004670	Kaempferol-3-O-glucoside-7-O-rhamnoside*	Flavonoids	Flavonols	C27H30O15	3	2392-95-2	0	0	0	6880.54	3971.91	16826.6
Lazn005175	1-(4-Hydroxy-3,5-dimethoxyphenyl)-2-[4-(3-hydroxypropyl)-2,6-dimethoxyphenoxy]propane-1,3-diol	Lignans and Coumarins	Lignans	C22H30O9	3	-	0	0	0	3938.29	6151.09	7664.91
pmp001311	6-Hydroxykaempferol-7,6-O-Diglucoside	Flavonoids	Flavonols	C27H30O17	3	-	0	0	0	100434	152980	71642.2
Lmsp004721	Tamarixetin-3-O-glucoside-7-O-rhamnoside*	Flavonoids	Flavonols	C28H32O16	3	-	0	0	0	95153.6	25965.8	173640
Wbjp002330	(3S)-1,3-dihydroxy-2,3,3a,4-tetrahydropyrrolo[2,1-b]quinazolin-9(1H)-one	Alkaloids	Alkaloids	C11H12N2O3	2	-	0	0	0	665875	538534	323552
pmb0819	3-Indoleacetonitrile	Alkaloids	Plumerane	C10H8N2	3	771-51-7	0	0	0	177393	140759	111708
Qahn003953	Erigeside B	Others	Others	C12H22O6	3	95632-87-4	0	0	0	36676.1	14384.8	27355.5
Lmmp002463	Sexangularetin-3-O-glucoside-7-O-rhamnoside*	Flavonoids	Flavonols	C28H32O16	3	-	0	0	0	92972.7	24601.3	162935
Wabn003563	3'-O-Beta-D-Glucopyranosyl plumbagic acid	Phenolic acids	Phenolic acids	C17H22O10	2	-	0	0	0	53649.2	37833.6	34079.6
Zmhp102730	6-Hydroxykaempferol-3,6-O-Diglucoside*	Flavonoids	Flavonols	C27H30O17	3	-	0	0	0	105294	149046	68545.8
Lman003972	6-O-Caffeoylarbutin	Phenolic acids	Phenolic acids	C21H22O10	2	136172-60-6	0	0	0	348951	53029.1	15992.3
Hagn003556	7-Benzyloxy-5-hydroxy-3',4'-methylenedioxyflavonoid	Flavonoids	Flavones	C23H16O6	2	-	0	0	0	26425	23843.2	41480.8
Labn004625	2-Phenylethyl beta-primeveroside	Phenolic acids	Phenolic acids	C19H28O10	1	129932-48-5	0	0	0	25106.5	8861.16	16709.5
pmn001583	Quercetin-3-O-robinobioside	Flavonoids	Flavonols	C27H30O16	3	52525-35-6	0	0	0	13742	8762.85	9710.4
Zjzp081836	2-Hydroxy diosgenin-Glc-Glc-Glc	Steroids	Steroidal saponins	C45H72O19	3	-	0	0	0	27380.6	93191.4	26492.6
Wcdn004141	2-[3-[4-[1,3-dihydroxy-1-(4-hydroxy-3-methoxyphenyl)propan-2-yl]oxy-3-methoxyphenyl]propoxy]-6-(hydroxymethyl)oxane-3,4,5-triol	Others	Others	C26H36O12	3	-	0	0	0	15685.5	24479.5	23556.6
MWSHC2041	sophorabioside	Flavonoids	Isoflavones	C27H30O14	3	2945-88-2	0	0	0	72834	26974.7	116001

## Sheet: SD9 vs. SD6
SD9 vs. SD6
Index	Compounds	Class I	Class II	Formula	Level	CAS	SD9a	SD9b	SD9c	SD6a	SD6b	SD6c
Saln003574	Genameside C	Terpenoids	Monoterpenoids	C23H34O15	3	-	19349	19164.4	22289.6	0	0	0
Sazp005659	Comazaphilone D	Others	Others	C21H22O7	3	-	7473.99	22850.9	19858	0	0	0
Lman003972	6-O-Caffeoylarbutin	Phenolic acids	Phenolic acids	C21H22O10	2	136172-60-6	9386.23	9397.57	31860.3	0	0	0
Wcdn004141	2-[3-[4-[1,3-dihydroxy-1-(4-hydroxy-3-methoxyphenyl)propan-2-yl]oxy-3-methoxyphenyl]propoxy]-6-(hydroxymethyl)oxane-3,4,5-triol	Others	Others	C26H36O12	3	-	5834.21	5406.42	11812.7	0	0	0
Yacn003968	Cantleyine	Alkaloids	Alkaloids	C11H13NO3	3	30333-81-4	0	0	0	2952.5	9838.02	7797.87
Lmmn001552	Leonuriside A	Phenolic acids	Phenolic acids	C14H20O9	2	121748-12-7	0	0	0	8992.32	47283.5	35733
Lmmn001294	Koaburaside*	Phenolic acids	Phenolic acids	C14H20O9	1	41653-73-0	0	0	0	13388.8	19396.8	25303.5
Hmgp002327	3-amino-2-naphthoic acid	Alkaloids	Alkaloids	C11H9NO2	1	-	0	0	0	4.79825e+06	20329.4	10948.4
MWSHY0064	Isorhamnetin-3-O-neohesperidoside*	Flavonoids	Flavonols	C28H32O16	3	55033-90-4	0	0	0	4107	10994.4	2588.62
pmp000087	2-Feruloyl-sn-glycerol	Phenolic acids	Phenolic acids	C13H16O6	3	-	0	0	0	14322.4	20887.2	8005.31
Hmtn001302	Glucosyloxybenzoic acid	Phenolic acids	Phenolic acids	C13H16O8	3	-	0	0	0	77942.2	99058.3	42080.1
Lcdn000131	sachaliside	Others	Others	C15H20O7	3	132294-76-9	0	0	0	49927	26140.4	48608.1
pme2292	Putrescine	Alkaloids	Alkaloids	C4H12N2	3	110-60-1	0	0	0	162098	239886	208785
pmp001265	2-Amino-4-dihydroxy octadecyl galactoside	Alkaloids	Alkaloids	C24H49NO8	2	-	0	0	0	44990	38557.6	49028.4
Zmxp005324	Dihydrodehydrodiconiferyl alcohol	Lignans and Coumarins	Lignans	C20H24O6	3	126253-41-6	0	0	0	18276	23320.9	19505.9
Zjhp090617	5-hydroxy-3-(2-hydroxy-4-methoxybenzyl)-7-methoxychroman-4-one	Flavonoids	Other Flavonoids	C18H18O6	3	-	0	0	0	6628.04	22090.7	13233.7
pmn001338	Rhein-8-O-glucoside	Quinones	Anthraquinone	C21H18O11	3	34298-86-7	0	0	0	3317.95	4236.91	6643.72
Cmlp002704	Folicanthine	Alkaloids	Plumerane	C24H30N4	3	6879-55-6	0	0	0	17483.4	18395.3	16809.1
Lmzn001582	5'-Glucosyloxyjasmanic acid	Phenolic acids	Phenolic acids	C18H28O9	1	-	0	0	0	38749	27372.3	20636.1
Hmhp006830	6,8-Dihydroxy-2-(2-hydroxy-4-methoxybenzyl)-7-methyl-3,4-dihydronaphthalen-1(2H)-one*	Flavonoids	Other Flavonoids	C18H18O6	2	-	0	0	0	12135.7	29372.5	12108.8
Wmgp004939	N-Desmethoxyrankinidine	Alkaloids	Plumerane	C19H22O2N2	3	-	0	0	0	13757.9	34171.1	50672.5
mws0011	Syringin	Phenolic acids	Phenolic acids	C17H24O9	2	118-34-3	0	0	0	75490.4	69791.9	78182
Ymjm000116	6-O-Acetylarbutin	Phenolic acids	Phenolic acids	C14H18O8	2	10338-88-2	0	0	0	19269.1	117149	36384.4
Saln003605	3'-O-Feruloyl Swertiamarin	Terpenoids	Monoterpenoids	C26H30O13	2	-	0	0	0	14432.9	22951	23162.5
pmn001692	3-O-Acetylhamayne	Alkaloids	Isoquinoline alkaloids	C18H19NO5	1	-	0	0	0	2762	7296.89	8935.41
Wbwn004173	Heteroclitin A	Lignans and Coumarins	Lignans	C28H36O8	3	140369-75-1	0	0	0	11394	14340.5	17252.7
Lmyp003408	Orcinol glucoside	Phenolic acids	Phenolic acids	C13H18O7	3	21082-33-7	0	0	0	22095.2	35094.4	33318.8
Wcdn004423	(2S,3R,4R)-3a-[(Beta-D-Glucopyranosyl)Oxy]Lyoniresinol	Lignans and Coumarins	Lignans	C28H38O13	1	-	0	0	0	10436	84712.5	47808.9
pma0702	N1,N8-Bis(sinapoyl)spermidine	Alkaloids	Phenolamine	C29H39N3O8	3	-	0	0	0	7780.76	5727.39	10083.6
Ymjm000148	Salidroside	Phenolic acids	Phenolic acids	C14H20O7	3	10338-51-9	0	0	0	76062.8	51865.4	35675.9
Layp003558	3,4,5-Trimethoxyphenol-1-O-β-D-glucoside	Phenolic acids	Phenolic acids	C15H22O9	2	-	0	0	0	53754.3	220307	117634
mws1434	Apigenin-6-C-glucoside (Isovitexin)	Flavonoids	Flavones	C21H20O10	3	38953-85-4	0	0	0	16433	8782.01	12313.9
Wbmp003116	10,11-dimethoxy-9-((3,4,5-trihydroxy-6-methyltetrahydro-2H-pyran-2-yl)oxy)-5,6,7a,8-tetrahydro-7H-[1,3]dioxolo[4',5':4,5]benzo[1,2,3-de]benzo[g]quinoline-7-carbaldehyde	Alkaloids	Alkaloids	C26H29NO10	3	-	0	0	0	38037.2	72432.9	22142.2
Lmdn003868	Frehmaglutoside G	Terpenoids	Monoterpenoids	C21H36O9	3	-	0	0	0	12894.3	14931.7	11647
